# Supplementary material for: Circular RNA Plek promotes fibrogenic activation by regulating the miR-135b-5p/TGF-βR1 axis after spinal cord injury
Source: publisher site journal article supplement (doi:10.18632/aging.203002), 2021-05-11
Supplement: Supplementary file [file aging-v13i9-203002-supplementary-material-SD1.pdf]

SUPPLEMENTARY FIGURE

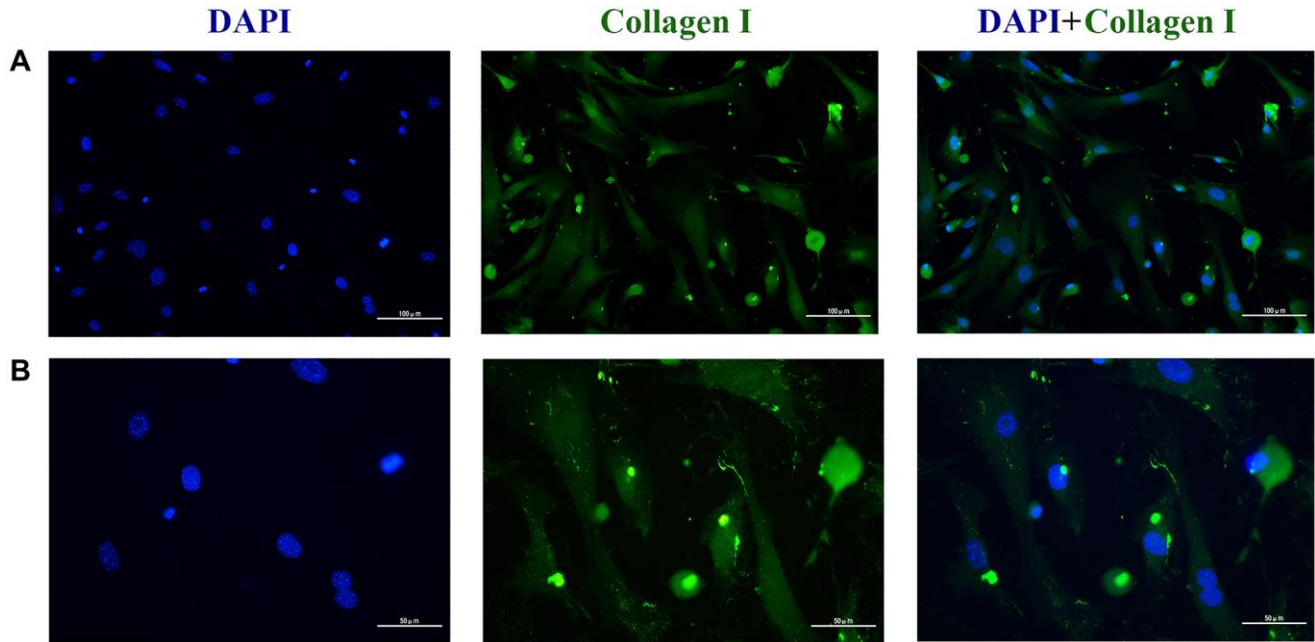

**Supplementary Figure 1. Identification of fibroblasts.** (A–B) Immunofluorescence staining of collagen I in spinal fibroblasts. Green represents collagen I staining, blue represents nuclear DNA staining by DAPI.
